# Supplementary material
Source: Research Square preprint supplement (doi:10.21203/rs.3.rs-8979829/v1)
Supplement: Supplementary file 1 [file 552a1ead371484f8e695b399.docx]

This manuscript is complimented by 5 supplementary files:

1. Supplementary Table 1_List of Genes to Filter.xls

Excel spreadsheet containing a list of 435 genes described as highly artefactual and in need of filtering.

1. Supplementary Table 2_Filtered Genes.xls

Excel spreadsheet containing a list of the highly artefactual genes filtered from the study.

1. Supplementary Table 3_PRSS1 Mutations.xls

Excel spreadsheet containing mutations identified in PRSS1 in all cell lines, each sheet corresponds to a cell line.

1. Supplementary Table 4_GBM Patient Cohort.xls

Excel spreadsheet containing mutations identified in PRSS1 in all cell lines, each sheet corresponds to a cell line.

1. Supplementary figures.docx

Word document containing supplementary figures and figure legends mentioned in the main text.
