# Supplementary material
Source: Research Square preprint supplement (doi:10.21203/rs.3.rs-8979829/v1)
Supplement: Supplementary file 2 [file 60027475869431f7e79e3c47.docx]

***
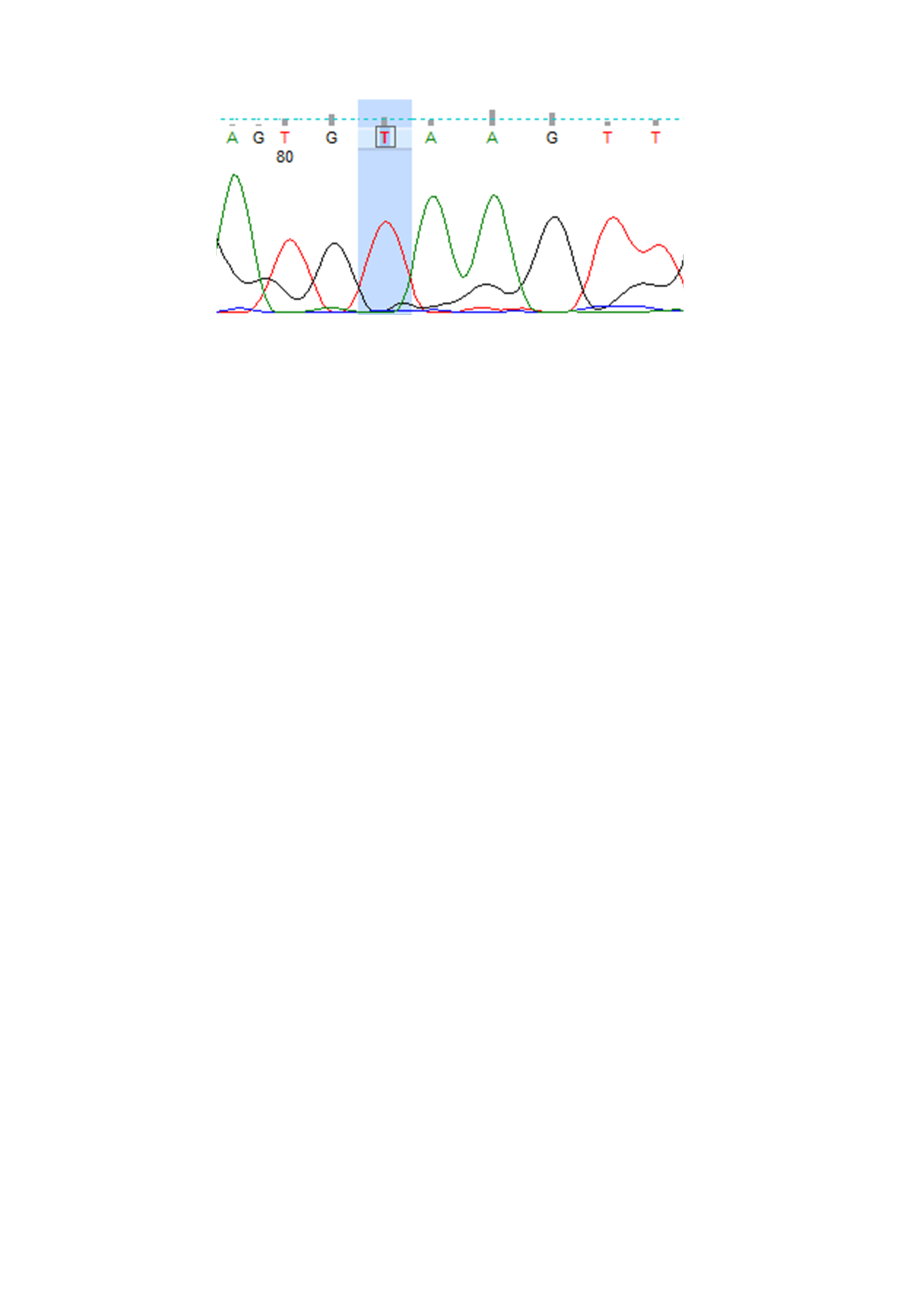
***

***Figure S1*:** *Representative Sanger sequencing of gDNA-GSCs KMT2C gene.*

*
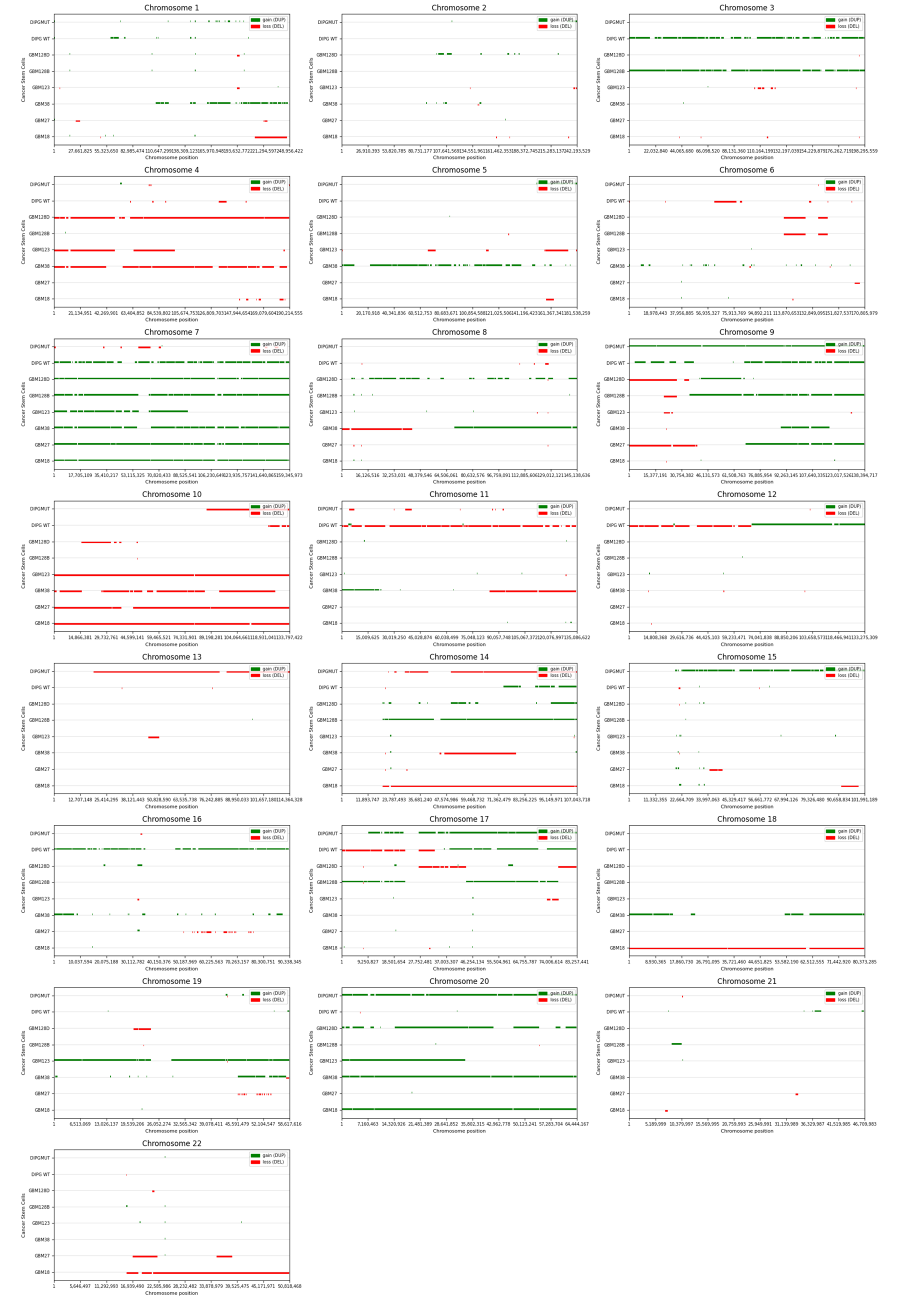
*

***Figure S2****: Expanded overview of CNV alterations across all chromosomes for each GSC (rows). Deletions are indicated by descending red bars, while amplifications are shown as ascending green bars.*

*
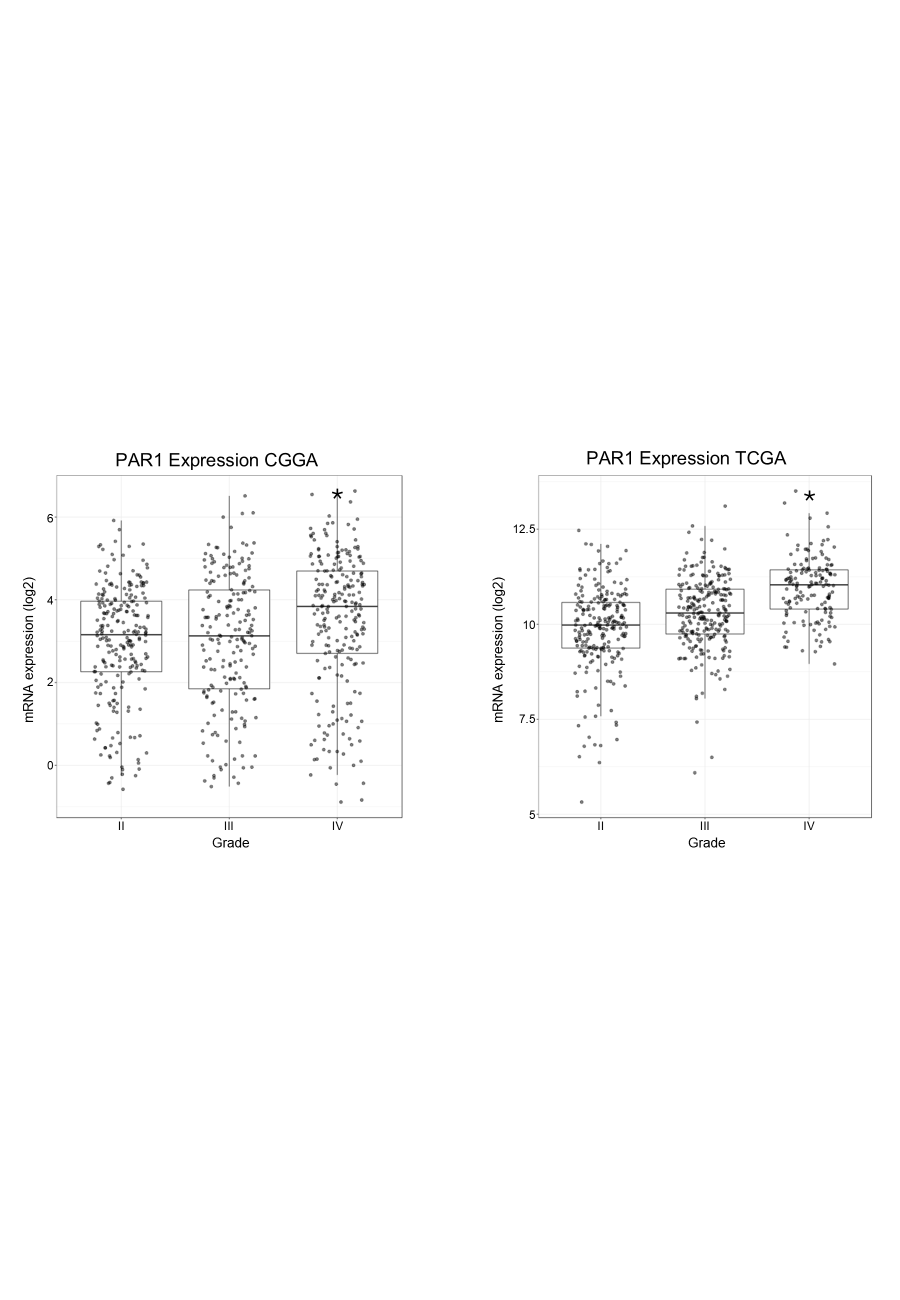
*

***Figure S3:*** *Boxplots of PAR1 expression in glioma patients (grades II-IV, from left to right) from CGGA (left) and TCGA (right) datasets. Each dot represents a patient, with median values and IQR shown. Patients are separated by histological grades. * p-value < 0.05.*
