# Supplementary material
Source: Research Square preprint supplement (doi:10.21203/rs.3.rs-8979829/v1)
Supplement: Supplementary file 3 [file 969aa27f1e499504c366b76e.xlsx]

## Sheet: Hoja1
ZNF717
CDC27
APQ10
KCNJ12
NBPF10
PCMTD1
CCHCR1
LOC653314
ABCD1
UGT2B11
LOC440396
LOC401010
AK124118
BC011779
BC058890
HRNR
WDR90
AMAC1L2
LOC283788
FLJ45422
CR603438
PMS2L5
MEIS3P1
BC101079
HLA-A
HLA-B
HLA-C
HLA-D
HLA-DRA
HLA-DRB5
HLA-DRB1
HLA-DQA2
HLA-DQB2
HLA-DQA1
HLA-DQA1/DRA
HLA-DQB1
HLA-DOA
HLA-DMB
HLA-DOB
HLA-DPA1
HLA-DPB1
HLA-DPB2
HLA-G
HLA-G3
HLA-G2.2
HLA-A*0226
HLA-Cw*070x
HLA-B*0707
HLA-H
MUC1
MUC12
MUC13
MUC15
MUC16
MUC17
MUC2
MUC20
MUC21
MUC3A
MUC3B
MUC3
MUC4
MUC5AC
MUC5b
MUC6
MUC7
TAS1R
TAS1R1
TAS1R2
TAS1R3
TAS2R1
TAS2R3
TAS2R4
TAS2R5
TAS2R16
TAS2R38
TAS2R39
TAS2R40
TAS2R41
TAS2R60
TAS2R7
TAS2R8
TAS2R9
TAS2R10
TAS2R13
TAS2R14
TAS2R50
TAS2R49
TAS2R48
TAS2R44
TAS2R46
TAS2R43
TAS2R47
TAS2R42
OR1A1
OR1A2
OR1B1
OR1C1
OR1D4
OR1D2
OR1E1
OR1E2
OR1F1
OR1F2
OR1G1
OR1J1
OR1J2
OR1J4
OR1K1
OR1L1
OR1L3
OR1L4
OR1L6
OR1L8
OR1M1
OR1N1
OR1N2
OR1Q1
OR1S1
OR1S2
OR2A1
OR2A2
OR2A4
OR2A5
OR2A7
OR2A12
OR2A14
OR2A25
OR2A42
OR2AG1
OR2AG2
OR2AE1
OR2F2
OR2A9P
OR2AK2
OR2B2
OR2B3
OR2B6
OR2B11
OR2C1
OR2C3
OR2D2
OR2D3
OR2F1
OR2F2
OR2G2
OR2G3
OR2G6
OR2H1
OR2H2
OR2J2
OR2J3
OR2K2
OR2L2
OR2L3
OR2L8
OR2L13
OR2L1P
OR2M1P
OR2M5
OR2M2
OR2M3
OR2M4
OR2M7
OR2S2
OR2T1
OR2T2
OR2T3
OR2T4
OR2T5
OR2T6
OR2T8
OR2T10
OR2T11
OR2T12
OR2T27
OR2T29
OR2T33
OR2T34
OR2T35
OR2V1
OR2W1
OR2W3
OR2W5
OR2Y1
OR2Z1
OR3A1
OR3A2
OR3A3
OR3A4
OR4A5
OR4A15
OR4A16
OR4A47
OR4B1
OR4C3
OR4C6
OR4C11
OR4C12
OR4C13
OR4C15
OR4C16
OR4C45
OR4C46
Or4D1
Or4D2
OR4D5
OR4D6
OR4D9
OR4D10
OR4D11
OR4E2
OR4F4
OR4F5
OR4F6
OR4F15
OR4F16
OR4F17
OR4F21
OR4K1
OR4K2
OR4K5
OR4K13
OR4K14
OR4K15
OR4K17
OR4L1
OR4M1
OR4M2
OR4N2
OR4N4
OR4N5
OR4P4
OR4Q3
OR4S1
OR4S2
OR4X1
OR4X2
OR5A1
OR5A2
OR5AC2
OR5AK2
OR5AN1
OR5AP2
OR5AR1
OR5AS1
OR5AU1
OR5B2
OR5B3
OR5B12
OR5B17
OR5B21
OR5C1
OR5D13
OR5D14
OR5D16
OR5D18
OR5E1P
OR5F1
OR5H1
OR5H2
OR5H6
OR5H14
OR5H15
OR5I1
OR5J2
OR5K1
OR5K2
OR5K3
OR5K4
OR5L1
OR5L2
OR5M1
OR5M3
OR5M8
OR5M9
OR5M10
OR5M11
OR5P2
OR5P3
OR5R1
OR5T1
OR5T2
OR5T3
OR5V1
OR5W2
OR6A2
OR6B1
OR6B2
OR6B3
OR6C1
OR6C2
OR6C3
OR6C4
OR6C6
OR6C65
OR6C68
OR6C74
OR6C75
OR6C76
OR6F1
OR6K2
OR6K3
OR6K6
OR6M1
OR6N1
OR6N2
OR6Q1
OR6S1
OR6T1
OR6V1
OR6W1P
OR6X1
OR6Y1
OR7A5
OR7A10
OR7A17
OR7C1
OR7C2
OR7D2
OR7D4
OR7E24
OR7E37P
OR7E91P
OR7E156P
OR7G1
OR7G2
OR7G3
OR8A1
OR8B2
OR8B3
OR8B4
OR8B8
OR8B12
OR8D1
OR8D2
OR8D4
OR8G1
OR8G2
OR8H1
OR8H2
OR8H3
OR8I2
OR8J1
OR8J3
OR8K1
OR8K3
OR8K5
OR8S1
OR8U8
OR9A2
OR9A4
OR9G4
OR9G9
OR9I1
OR9Q1
OR9Q2
OR10A2
OR10A3
OR10A4
OR10A5
OR10A6
OR10A7
OR10AD1
OR10AG1
OR10C1
OR10G2
OR10G3
OR10G4
OR10G7
OR10G8
OR10G9
OR10H1
OR10H2
OR10H3
OR10H4
OR10H5
OR10J1
OR10J3
OR10J5
OR10K1
OR10K2
OR10P1
OR10Q1
OR10R2
OR10S1
OR10T2
OR10V1
OR10W1
OR10X1
OR10Z1
OR11A1
OR11g2
OR11H1
OR11H4
OR11H6
OR11H12
OR11L1
OR12D2
OR12D3
OR13A1
OR13C2
OR13C3
OR13C4
OR13C5
OR13C8
OR13C9
OR13D1
OR13F1
OR13G1
OR13H1
OR13J1
OR14A16
OR14C36
OR14I1
OR14J1
OR51B2
OR51B4
OR51B5
OR51B6
OR51D1
OR51E1
OR51F1
OR51G1
OR52H1
OR51I1
OR51J1
OR51L1
OR51M1
OR51Q1
OR51S1
OR51T1
OR51V1
OR52I1
OR52I2
