# Supplementary material
Source: Research Square preprint supplement (doi:10.21203/rs.3.rs-8979829/v1)
Supplement: Supplementary file 4 [file b69a6950533969e9171f93ed.xlsx]

## Sheet: Hoja1
Patient ID	Diagnosis	Age	Sex	PRSS1 p.Gly177*
TCGBM18	GBM	25	M	Yes
TCGBM20	GBM	42	M	No
TCGBM39	GBM	66	M	No
TCGBM41	GBM	64	F	No
TCGBM44	GBM (Recurrence)	39	F	No
HGM009	GBM	NA	F	No
HGM013	GBM (Recurrence)	NA	M	No
HGM015	GBM	NA	F	No
HM018A	GBM	65	M	No
