# Supplementary material
Source: Research Square preprint supplement (doi:10.21203/rs.3.rs-8979829/v1)
Supplement: Supplementary file 5 [file b79da10fa4974abab0db36aa.xlsx]

## Sheet: Hoja1
Gene Name
ZNF717
CDC27
KCNJ12
NBPF10
CCHCR1
HRNR
WDR90
HLA-A
HLA-B
HLA-C
HLA-DRB5
HLA-DRB1
HLA-DQA2
HLA-DQB2
HLA-DQA1
HLA-DQB1
HLA-DOB
HLA-DPB1
MUC1
MUC12
MUC15
MUC16
MUC17
MUC20
MUC21
MUC3A
MUC4
MUC5AC
MUC5b
MUC6
MUC7
TAS1R1
TAS2R38
TAS2R46
TAS2R43
TAS2R42
OR1A2
OR1B1
OR1L4
OR1S1
OR2A1
OR2A42
OR2AK2
OR2B2
OR2G3
OR2L2
OR2L3
OR2L8
OR2M2
OR2T2
OR2T3
OR2T4
OR2T5
OR2T8
OR2T12
OR2T27
OR2T29
OR2T33
OR2T34
OR2T35
OR2W5
OR3A2
OR4A5
OR4C13
OR4C15
OR4C46
OR4E2
OR4F5
OR4F17
OR4F21
OR4K5
OR4M1
OR4M2
OR4N2
OR4N4
OR5A1
OR5AK2
OR5AS1
OR5D14
OR5K1
OR5K4
OR5M10
OR6B2
OR6B3
OR6F1
OR6V1
OR7C2
OR8B2
OR8B3
OR8D2
OR8G1
OR8H1
OR8K1
OR9G9
OR10G2
OR10G4
OR10G9
OR10H1
OR10H4
OR10H5
OR11g2
OR11H1
OR11H12
OR12D2
OR13C2
OR13C5
OR51F1
OR51S1
